# Supplementary material
Source: PubMed Central journal article supplement (PMC4961239)
Supplement: NIHMS64452-supplement-Supplementary_Information.pdf [file NIHMS64452-supplement-Supplementary_Information.pdf]

## Supplementary Information |

| Gene    | Log <sub>2</sub> MDA wt Air | Log <sub>2</sub> MDA wt Hyp | Log <sub>2</sub> MDA BT Air | Log <sub>2</sub> MDA BT Hyp |
|---------|-----------------------------|-----------------------------|-----------------------------|-----------------------------|
| ACTA1   | 29.51                       | 29.47                       | 29.60                       | 29.20                       |
| ACTN1   | 29.33                       | 29.22                       | 29.54                       | 29.27                       |
| ACTN4   | 31.04                       | 30.88                       | 31.45                       | 31.24                       |
| AGRN    | 28.25                       | 28.23                       | 29.32                       | 29.79                       |
| ALDOA   | 31.12                       | 31.25                       | 31.76                       | 31.92                       |
| ANXA1   | 26.83                       | 26.75                       | 27.07                       | 26.56                       |
| ANXA2   | 29.22                       | 29.21                       | 29.25                       | 29.09                       |
| ANXA5   | 27.04                       | 27.08                       | 26.92                       | 26.56                       |
| APLP2   | 30.39                       | 30.35                       | 30.88                       | 31.28                       |
| APP     | 30.88                       | 30.91                       | 30.39                       | 30.70                       |
| AXL     | 29.94                       | 30.10                       | 30.45                       | 31.01                       |
| B2M     | 31.02                       | 31.09                       | 32.13                       | 32.48                       |
| C1QTNF3 | 27.94                       | 27.76                       | 27.49                       | 27.61                       |
| CALRx   | 26.37                       | 26.40                       | 26.49                       | 26.08                       |
| CAPZA1  | 27.12                       | 26.87                       | 27.11                       | 27.21                       |
| CCDC80  | 26.08                       | 25.78                       | 27.35                       | 27.98                       |
| CD44    | 29.37                       | 29.25                       | 29.99                       | 30.57                       |
| CDH13   | 25.74                       | 25.88                       | 24.83                       | 25.35                       |
| CDH4    | 26.80                       | 26.68                       | 25.33                       | 25.54                       |
| CDK1    | 26.10                       | 26.01                       | 26.27                       | 26.46                       |
| CLIC4   | 26.66                       | 26.74                       | 26.76                       | 27.03                       |
| CLSTN1  | 29.73                       | 29.89                       | 29.76                       | 30.16                       |
| CLTC    | 27.98                       | 27.48                       | 28.15                       | 27.91                       |
| CNTN1   | 24.89                       | 25.34                       | 23.90                       | 23.71                       |
| COL12A1 | 28.83                       | 28.94                       | 28.69                       | 28.86                       |
| COL18A1 | 26.39                       | 26.15                       | 27.47                       | 27.59                       |
| COL1A1  | 29.15                       | 29.25                       | 28.77                       | 28.65                       |
| COL1A2  | 28.21                       | 28.18                       | 27.43                       | 27.74                       |
| COL2A1  | 26.68                       | 26.70                       | 25.85                       | 26.27                       |
| COL5A1  | 27.36                       | 27.65                       | 27.83                       | 28.36                       |
| COL6A1  | 29.43                       | 29.54                       | 30.29                       | 30.55                       |
| CPE     | 25.19                       | 25.37                       | 25.66                       | 25.84                       |
| CSF1    | 26.88                       | 27.40                       | 28.09                       | 28.72                       |
| CST3    | 31.07                       | 31.30                       | 32.38                       | 32.83                       |
| CTGF    | 29.77                       | 29.60                       | 28.01                       | 28.33                       |
| CTSB    | 27.99                       | 28.03                       | 28.97                       | 29.42                       |
| CTSC    | 29.76                       | 29.78                       | 27.97                       | 28.52                       |
| CTSD    | 31.46                       | 31.65                       | 32.59                       | 32.68                       |
| CTSL    | 28.28                       | 28.29                       | 28.53                       | 28.94                       |
| CTSZ    | 29.15                       | 29.04                       | 29.93                       | 30.63                       |
| CYR61   | 28.52                       | 28.03                       | 28.94                       | 29.07                       |
| DAG1    | 28.94                       | 29.07                       | 29.43                       | 29.82                       |
| DKK1    | 27.82                       | 27.71                       | 28.39                       | 29.06                       |
| ECM1    | 27.57                       | 27.86                       | 28.01                       | 28.29                       |

|          |       |       |       |       |
|----------|-------|-------|-------|-------|
| EDIL3    | 28.38 | 28.57 | 27.90 | 27.78 |
| EHD1     | 26.14 | 26.31 | 27.62 | 27.57 |
| ENO1     | 32.65 | 32.67 | 32.88 | 33.26 |
| EZR      | 28.22 | 28.39 | 28.83 | 29.06 |
| FAM3C    | 27.82 | 27.83 | 29.29 | 29.42 |
| FKBP1A   | 27.69 | 27.96 | 28.59 | 28.97 |
| FLNA     | 30.97 | 30.70 | 31.34 | 31.21 |
| FLNC     | 28.39 | 28.20 | 28.45 | 28.56 |
| FMOD     | 26.69 | 26.88 | 25.31 | 25.94 |
| FN1      | 30.51 | 30.74 | 31.72 | 31.81 |
| G6PD     | 26.26 | 25.59 | 28.06 | 27.97 |
| GAPDH    | 31.87 | 31.81 | 32.01 | 32.08 |
| GGH      | 28.60 | 28.78 | 28.37 | 28.73 |
| GPI      | 29.17 | 29.27 | 29.47 | 29.64 |
| HIST1H4A | 27.47 | 27.68 | 27.49 | 27.19 |
| HNRNPK   | 27.63 | 26.68 | 27.60 | 27.34 |
| HSP90AA1 | 29.51 | 29.19 | 29.41 | 29.11 |
| HSP90AB1 | 30.64 | 30.23 | 30.72 | 30.45 |
| HSP90B1  | 27.33 | 27.03 | 27.04 | 27.07 |
| HSPA8    | 31.62 | 31.32 | 31.64 | 31.77 |
| HSPG2    | 27.95 | 27.92 | 28.60 | 29.22 |
| HSPH1    | 26.26 | 26.34 | 25.82 | 26.02 |
| HTRA1    | 26.29 | 26.48 | 26.80 | 27.01 |
| IGF2R    | 27.91 | 28.00 | 27.27 | 27.40 |
| IGFBP1   | 29.43 | 29.41 | 27.01 | 28.05 |
| IGFBP4   | 30.21 | 30.28 | 30.36 | 30.46 |
| IGFBP7   | 30.77 | 30.64 | 32.05 | 32.45 |
| IL6ST    | 25.57 | 25.48 | 25.81 | 25.74 |
| IQGAP1   | 26.96 | 26.42 | 27.17 | 27.11 |
| ITGB1    | 26.72 | 26.69 | 27.15 | 27.16 |
| KAL1     | 25.05 | 25.19 | 25.77 | 26.59 |
| KPNB1    | 27.36 | 27.37 | 27.85 | 27.60 |
| L1CAM    | 27.16 | 26.88 | 27.90 | 28.49 |
| LAMA5    | 27.67 | 27.53 | 28.80 | 29.10 |
| LAMB2    | 24.79 | 24.49 | 23.53 | 24.36 |
| LAMC1    | 27.43 | 27.36 | 28.23 | 28.34 |
| LASP1    | 28.09 | 27.87 | 28.74 | 28.94 |
| LDHA     | 31.47 | 31.79 | 32.06 | 32.27 |
| LDLR     | 26.28 | 26.52 | 26.02 | 26.55 |
| LGALS1   | 29.00 | 28.99 | 30.35 | 30.20 |
| LGALS3BP | 32.15 | 32.15 | 32.24 | 32.48 |
| LMNA     | 29.68 | 29.62 | 30.64 | 30.72 |
| LOX      | 27.04 | 27.70 | 27.58 | 28.76 |
| LOXL2    | 29.45 | 29.93 | 29.70 | 30.47 |
| LOXL4    | 25.70 | 25.71 | 26.55 | 27.43 |
| MATN2    | 26.63 | 26.67 | 27.17 | 27.83 |
| MET      | 27.08 | 27.25 | 27.56 | 28.18 |
| MFGE8    | 26.40 | 26.56 | 25.25 | 25.40 |

|          |       |       |       |       |
|----------|-------|-------|-------|-------|
| MMP1     | 30.45 | 30.49 | 26.52 | 26.55 |
| MMP14    | 28.11 | 28.33 | 27.85 | 28.54 |
| MSN      | 30.92 | 30.86 | 31.37 | 31.48 |
| MYH9     | 29.32 | 29.18 | 30.38 | 30.11 |
| NME2     | 30.58 | 30.42 | 31.05 | 31.21 |
| NPC2     | 26.36 | 26.47 | 26.78 | 26.65 |
| NRP1     | 28.58 | 28.54 | 27.98 | 28.55 |
| NUCB1    | 28.55 | 28.67 | 29.13 | 29.62 |
| P4HB     | 27.15 | 26.80 | 27.36 | 27.47 |
| PAM      | 25.97 | 26.08 | 26.74 | 27.30 |
| PDIA3    | 27.33 | 27.01 | 27.60 | 27.95 |
| PKM      | 32.20 | 32.23 | 32.53 | 32.49 |
| PLAT     | 28.23 | 28.75 | 29.54 | 29.83 |
| PLEC     | 29.18 | 28.50 | 29.58 | 29.60 |
| PLOD1    | 27.63 | 27.97 | 28.10 | 28.56 |
| PLTP     | 26.48 | 26.96 | 26.09 | 26.45 |
| PPIA     | 31.84 | 31.93 | 32.39 | 32.73 |
| PPIB     | 27.51 | 27.30 | 27.73 | 27.71 |
| PPT1     | 27.28 | 27.33 | 25.69 | 25.96 |
| PRKCSH   | 27.26 | 26.91 | 26.78 | 27.28 |
| PSAP     | 27.13 | 27.46 | 28.08 | 27.93 |
| PSMA2    | 26.38 | 26.34 | 26.71 | 26.89 |
| PSMA3    | 25.13 | 24.97 | 25.55 | 25.36 |
| PSMA5    | 26.56 | 26.26 | 26.70 | 26.74 |
| PSMA7    | 26.46 | 26.40 | 26.77 | 26.48 |
| PSMD11   | 25.51 | 25.22 | 25.35 | 25.10 |
| PSMD14   | 25.02 | 24.63 | 25.12 | 24.91 |
| PSMD2    | 25.97 | 25.87 | 25.93 | 25.73 |
| PSME1    | 26.59 | 26.65 | 27.27 | 27.39 |
| PSME2    | 26.49 | 26.42 | 26.97 | 26.97 |
| PTPRF    | 27.39 | 27.63 | 26.35 | 26.94 |
| PTPRK    | 27.19 | 27.45 | 28.19 | 28.52 |
| PTPRS    | 25.66 | 25.83 | 25.55 | 25.95 |
| PTX3     | 29.12 | 29.15 | 28.27 | 28.65 |
| PVR      | 27.60 | 27.94 | 27.54 | 27.96 |
| PXDN     | 28.79 | 29.00 | 27.44 | 27.89 |
| QSOX1    | 31.52 | 31.54 | 31.23 | 31.38 |
| SDC4     | 26.55 | 26.95 | 27.39 | 27.97 |
| SEMA7A   | 27.43 | 27.43 | 25.57 | 26.38 |
| SERPINB6 | 24.94 | 24.96 | 24.88 | 25.33 |
| SERPINE1 | 30.88 | 31.12 | 32.34 | 32.75 |
| SERPINE2 | 27.58 | 27.64 | 26.44 | 26.92 |
| SERPINH1 | 25.56 | 25.25 | 25.51 | 25.67 |
| SFN      | 27.44 | 27.54 | 29.26 | 29.04 |
| SOD1     | 28.19 | 28.03 | 28.71 | 28.83 |
| SPTAN1   | 26.30 | 26.17 | 26.52 | 26.40 |
| STC1     | 26.47 | 26.92 | 26.99 | 28.02 |
| TCP1     | 26.73 | 26.64 | 26.47 | 26.29 |

|         |       |       |       |       |
|---------|-------|-------|-------|-------|
| TFRC    | 27.82 | 27.66 | 27.26 | 27.55 |
| TGFBI   | 27.47 | 27.52 | 29.46 | 29.76 |
| THBS1   | 33.64 | 33.66 | 33.99 | 34.29 |
| TIMP1   | 30.33 | 30.40 | 31.44 | 31.70 |
| TIMP2   | 29.51 | 29.63 | 30.29 | 30.67 |
| TINAGL1 | 26.89 | 27.09 | 27.45 | 28.19 |
| TLN1    | 29.73 | 29.75 | 29.75 | 29.79 |
| TMSB4X  | 29.59 | 29.74 | 30.95 | 30.74 |
| TNC     | 28.64 | 28.68 | 26.90 | 27.31 |
| TPT1    | 28.19 | 27.72 | 28.07 | 28.08 |
| VASN    | 25.63 | 25.95 | 26.90 | 27.15 |
| VCL     | 30.43 | 30.45 | 30.62 | 30.77 |
| VCP     | 28.79 | 28.54 | 29.27 | 29.14 |
| VIM     | 32.58 | 32.17 | 32.43 | 32.36 |
| WDR1    | 28.89 | 28.77 | 29.83 | 29.99 |
| YWHAB   | 28.94 | 28.95 | 29.58 | 29.89 |
| YWHAE   | 29.69 | 29.60 | 30.04 | 30.02 |
| YWHAG   | 27.48 | 27.44 | 28.42 | 28.42 |
| YWHAH   | 26.28 | 26.24 | 27.12 | 26.71 |
| YWHAQ   | 27.91 | 27.80 | 28.99 | 28.48 |
| YWHAZ   | 31.54 | 31.55 | 32.12 | 32.12 |

Average Log<sub>2</sub> secretome expression values from global differential quantitative mass spectrometry based proteomics. Raw data was processed using MaxQuant v1.5 and Perseus v1.4 and results analysed using scripts written in-house in Python, and statistically tested for significance using the quantile function in the R statistical framework. To ensure high confidence identifications and quantitation, a MaxQuant score of >50 and a minimum of 3 unique peptides per protein seen by MS/MS in all repeats was required. Initial analysis was undertaken using a label-free approach (2x repeats), and data subsequently validated in a standard- and reverse-label SILAC approach (2x repeats). Intracellular contaminants were removed and secreted proteins retained by using the cellular compartment annotations in Ensembl and PantherDB and Gene Ontology annotation enrichment for extracellular associated terms.
