# Supplementary material
Source: PubMed Central journal article supplement (PMC4961239)

Full scans for Extended Data Figure 1d

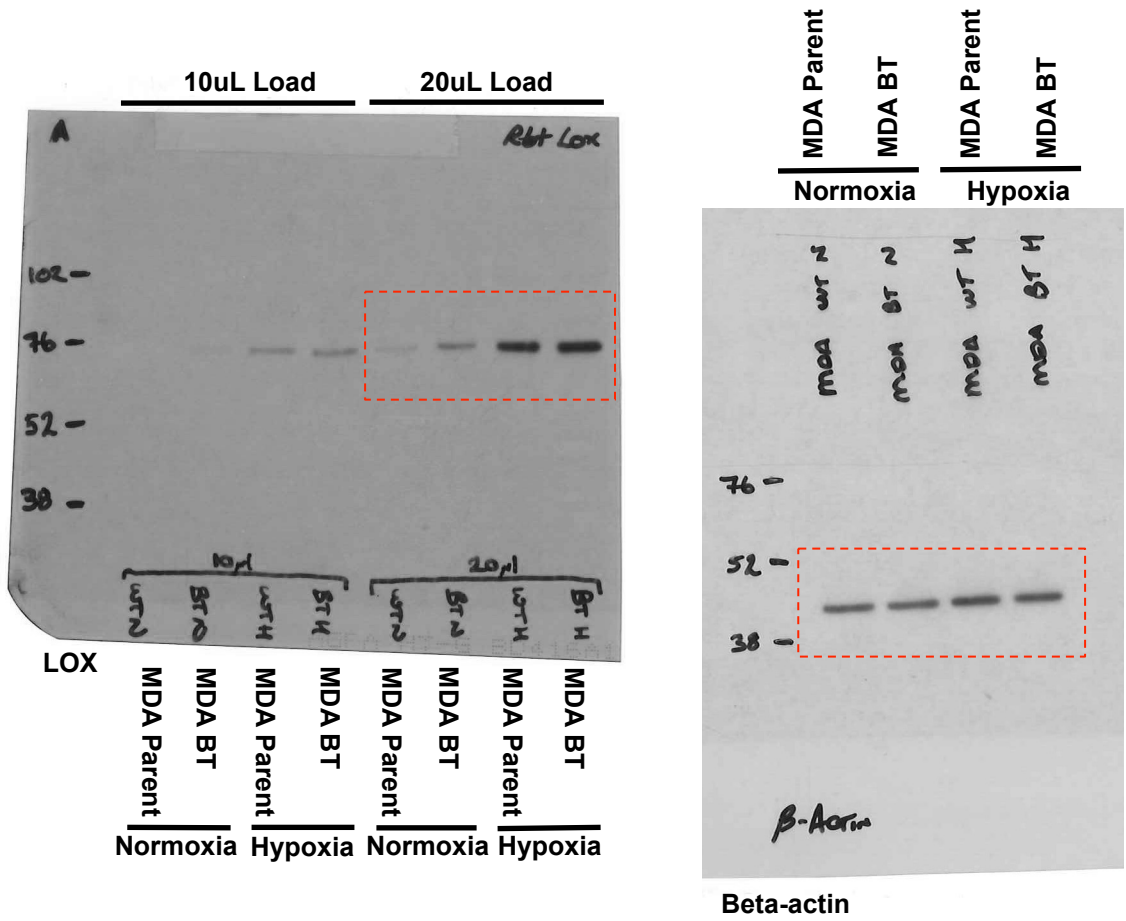

Full scans for Extended Data Figure 4a

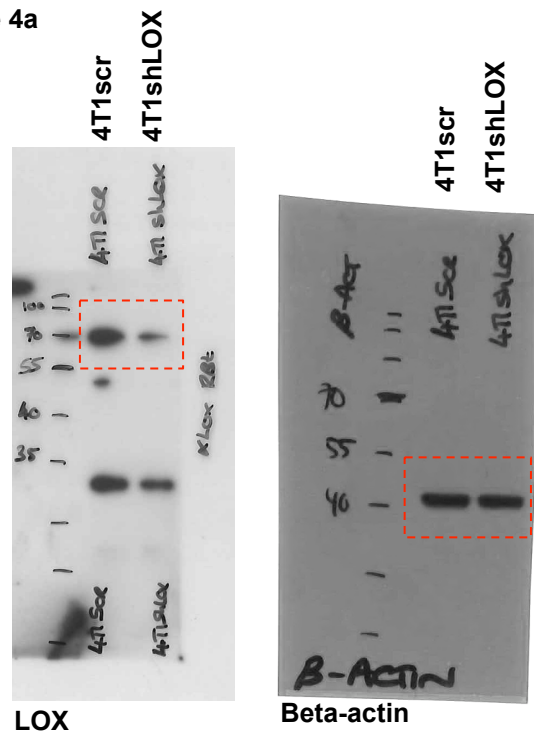

Supplement: NIHMS64452-supplement-Full_scans_for_Extended_Data.pdf [file NIHMS64452-supplement-Full_scans_for_Extended_Data.pdf]
